# Supplementary material
Source: PubMed Central journal article supplement (PMC4710175)
Supplement: NIHMS742972-supplement-SI.pdf [file NIHMS742972-supplement-SI.pdf]

## Evolution of invasiveness through increased resource use in a vacant niche

**Supplementary Table 1. Locality details for source populations used in the common garden.**

| Site   | Location | Latitude  | Longitude | Site          | Location | Latitude  | Longitude   |
|--------|----------|-----------|-----------|---------------|----------|-----------|-------------|
| Europe |          |           |           | North America |          |           |             |
| Etch   | Armenia  | 40.162500 | 44.474167 | CLV           | USA (CA) | 36.916300 | -119.793490 |
| K113   | Armenia  | 40.131528 | 44.762472 | COL           | USA (CA) | 38.926820 | -122.007000 |
| K125   | Armenia  | 40.282861 | 44.195722 | DIA           | USA (CA) | 37.865260 | -121.977850 |
| K126   | Armenia  | 40.282861 | 44.195694 | GIL           | USA (CA) | 37.033730 | -121.536740 |
| K132   | Armenia  | 40.110028 | 44.084639 | LEB           | USA (CA) | 34.827360 | -118.870970 |
| K146   | Armenia  | 40.172444 | 44.585722 | MAR           | USA (CA) | 38.019000 | -122.605800 |
| K149   | Armenia  | 40.169167 | 44.271500 | NEE           | USA (CA) | 36.850500 | -120.762210 |
| Bu24   | Bulgaria | 43.382222 | 28.457667 | ORC           | USA (CA) | 36.935150 | -119.051460 |
| CAZ    | France   | 43.748420 | 3.770610  | ORO           | USA (CA) | 39.493980 | -121.687880 |
| GR18   | Greece   | 39.542222 | 22.327533 | RB            | USA (CA) | 40.270830 | -122.271040 |
| GR20   | Greece   | 40.238433 | 22.334110 | RED           | USA (CA) | 40.670810 | -122.241920 |
| GR21   | Greece   | 40.942000 | 23.258283 | RES           | USA (CA) | 40.918250 | -122.398770 |
| HU01   | Hungary  | 47.182400 | 18.089283 | SER           | USA (CA) | 39.001506 | -122.357025 |
| HU29   | Hungary  | 47.317850 | 21.033850 | SIE           | USA (CA) | 38.781617 | -120.416386 |
| RO25   | Romania  | 44.124733 | 28.634183 | TE            | USA (CA) | 35.145320 | -118.470110 |
| CAN    | Spain    | 41.000330 | -4.897180 | TRI           | USA (CA) | 37.461780 | -119.792180 |
| CUE    | Spain    | 40.129460 | -2.139500 | UKI           | USA (CA) | 39.163630 | -123.227050 |
| GRA    | Spain    | 37.268360 | -3.664970 | VET           | USA (CA) | 38.099960 | -120.589470 |
| SAL    | Spain    | 40.990030 | -5.658560 | YRE           | USA (CA) | 41.691610 | -122.639880 |
| SAZ    | Spain    | 39.835230 | -2.511430 | GOL           | USA (OR) | 42.435500 | -123.043590 |
| TER    | Spain    | 41.705520 | 0.748940  |               |          |           |             |
| TK23   | Turkey   | 41.751233 | 27.247883 |               |          |           |             |

**Supplementary Table 2. REML models of size**

| Response variable                                 |                                 |    |                     |                 |
|---------------------------------------------------|---------------------------------|----|---------------------|-----------------|
| Effect type                                       | Effect                          | df | F or X <sup>2</sup> | P value         |
| <b>Size index at 3.5 weeks</b>                    |                                 |    |                     |                 |
| Fixed                                             | region                          | 1  | 12.338              | 0.0005          |
| Fixed                                             | population w/in region          | 40 | 4.1335              | <0.0001         |
| Fixed                                             | observer <sup>a</sup>           | 3  | 2.2633              | 0.08            |
| Fixed                                             | seed mass                       | 1  |                     | NS <sup>d</sup> |
| Fixed                                             | age at measurement <sup>b</sup> | 1  |                     | NS <sup>d</sup> |
| Fixed                                             | age at measurement x region     | 1  |                     | NS <sup>d</sup> |
| Random                                            | block <sup>c</sup>              |    |                     | NS <sup>d</sup> |
| <b>Size index at 5 weeks</b>                      |                                 |    |                     |                 |
| Fixed                                             | region                          | 1  | 47.7822             | <0.0001         |
| Fixed                                             | population w/in region          | 40 | 3.0482              | <0.0001         |
| Fixed                                             | observer <sup>a</sup>           | 3  | 2.38                | 0.07            |
| Fixed                                             | age at measurement <sup>b</sup> | 1  |                     | NS <sup>d</sup> |
| Fixed                                             | age at measurement x region     | 1  |                     | NS <sup>d</sup> |
| Random                                            | block <sup>c</sup>              |    |                     | NS <sup>d</sup> |
| <b>Size index at 5 weeks: seed mass covariate</b> |                                 |    |                     |                 |
| Fixed                                             | region                          | 1  | 6.7324              | 0.01            |
| Fixed                                             | population w/in region          | 40 | 3.1285              | <0.0001         |
| Fixed                                             | observer <sup>a</sup>           | 3  | 2.2278              | 0.08            |
| Fixed                                             | seed mass                       | 1  | 5.7823              | 0.02            |
| <b>Final Biomass</b>                              |                                 |    |                     |                 |
| Fixed                                             | region                          | 1  | 5.1401              | 0.02            |
| Fixed                                             | population w/in region          | 40 | 1.9051              | 0.003           |
| Fixed                                             | harvest day <sup>e</sup>        | 1  |                     | NS <sup>d</sup> |
| Fixed                                             | seed mass                       | 1  |                     | NS <sup>d</sup> |

**Supplementary Table 3. REML models of reproduction**

| Response variable                                  |                          | df | F or $X^2$ | <i>P</i> value  |
|----------------------------------------------------|--------------------------|----|------------|-----------------|
| Effect type                                        | Effect                   |    |            |                 |
| Probability of flowering                           |                          |    |            |                 |
| Fixed                                              | region                   | 1  | 0.00006    | 0.99 (NS)       |
| Fixed                                              | population w/in region   | 40 | 79.3173    | 0.0002          |
| Number of capitula                                 |                          |    |            |                 |
| Fixed                                              | region                   | 1  | 25.2397    | <0.0001         |
| Fixed                                              | population w/in region   | 35 | 2.6082     | <0.0001         |
| Fixed                                              | harvest day <sup>a</sup> | 1  | 4.6458     | 0.03            |
| Fixed                                              | seed mass                | 1  |            | NS <sup>b</sup> |
| Number of capitula: date of first flower covariate |                          |    |            |                 |
| Fixed                                              | region                   | 1  | 0.6345     | 0.43 (NS)       |
| Fixed                                              | population w/in region   | 35 | 2.1562     | 0.002           |
| Fixed                                              | harvest day <sup>a</sup> | 1  | 4.0595     | 0.047           |
| Fixed                                              | date of first flower     | 1  | 84.8509    | <.0001          |

<sup>a</sup>Harvest day is the age of the plant at harvest, and was recorded to account for error in the ascertainment of full senescence in YST, which can continue to reproduce after all aboveground biomass appears non-photosynthetic and physiologically inactive.

<sup>b</sup>Highly non-significant (NS) correlates ( $P > 0.1$ ) were removed from final models.

**Supplementary Table 4. ANCOVA models of plant size versus bioclimatic variables**

| Model effects <sup>a</sup>                | P values for models of size at |                   |
|-------------------------------------------|--------------------------------|-------------------|
|                                           | 3.5 weeks                      | 5 weeks           |
| mean annual temperature (b1)              | NS                             | 0.03              |
| region (native vs. invading)              | 0.002                          | <0.0001           |
| <b>temperature seasonality (b4)</b>       | <b>0.0004</b>                  | <b>&lt;0.0001</b> |
| <b>    region (native vs. invading)</b>   | <b>&lt;0.0001</b>              | <b>&lt;0.0001</b> |
| temperature of the driest quarter (b9)    | NS                             | NS                |
| region (native vs. invading)              | NS                             | 0.0007            |
| annual precipitation (b12)                | NS                             | NS                |
| region (native vs. invading)              | 0.01                           | 0.002             |
| precipitation seasonality (b15)           | NS                             | NS                |
| region (native vs. invading)              | 0.04                           | NS                |
| precipitation of the driest quarter (b17) | NS                             | NS                |
| region (native vs. invading)              | 0.005                          | 0.01              |
| solar radiation seasonality (b23)         | NS                             | NS                |
| region (native vs. invading)              | 0.005                          | 0.0003            |

<sup>a</sup>All models included interactions between bioclimatic variable and region; interactions were non-significant and excluded in all cases. For both bioclimatic variable (continuous) and region (categorical), df = 1. Samples are 20 invading and 22 native population Least Squares Means estimates of size in each model. Bioclimatic variables values for each site were interpolated from CliMond datasets using ArcGIS.

**Supplementary Table 5. REML models of response to drought**

| Response variable                                                 |                          | df | F or $X^2$ | P value         |
|-------------------------------------------------------------------|--------------------------|----|------------|-----------------|
| Effect type                                                       | Effect                   |    |            |                 |
| Drought tolerance (days to wilt)                                  |                          |    |            |                 |
| Fixed                                                             | region                   | 1  | 19.4245    | <0.0001         |
| Fixed                                                             | population w/in region   | 40 | 2.8508     | <0.0001         |
| Random                                                            | block <sup>a</sup>       |    |            | NS <sup>b</sup> |
| Drought tolerance (days to wilt): size index at 5 weeks covariate |                          |    |            |                 |
| Fixed                                                             | region                   | 1  | 5.1555     | 0.02            |
| Fixed                                                             | population w/in region   | 40 | 2.2153     | <0.0001         |
| Fixed                                                             | size at 5 weeks          | 1  | 124.4332   | <0.0001         |
| Fixed                                                             | size at 5 weeks x region |    |            | NS <sup>b</sup> |

<sup>a</sup>Blocks were used to account for environmental variation across the glasshouse space, and included five spatial blocks of each treatment, each including two individuals per population randomized within the block.

<sup>b</sup>Highly non-significant (NS) correlates ( $P > 0.1$ ) were removed from final models.

**Supplementary Table 6. Correlation coefficients<sup>a</sup> (r<sup>2</sup>) among CliMond Bioclim variables**

| Variable | Description                                       | b1   | b4   | b9   | b12  | b15  | b17  | b23   |
|----------|---------------------------------------------------|------|------|------|------|------|------|-------|
| bio1     | Annual mean temperature (°C)                      | *    |      |      |      |      |      |       |
| bio8     | Mean temperature of wettest quarter (°C)          | 0.77 |      |      |      |      |      |       |
| bio10    | Mean temperature of warmest quarter (°C)          | 0.91 |      |      |      |      |      |       |
| bio11    | Mean temperature of coldest quarter (°C)          | 0.93 |      |      |      |      |      |       |
| bio24    | Radiation of wettest quarter (W m <sup>-2</sup> ) | 0.76 |      |      |      |      |      |       |
| bio4     | Temperature seasonality (C of V)                  |      | *    |      |      |      |      |       |
| bio7     | Temperature annual range (bio5-bio6) (°C)         |      | 0.86 |      |      |      |      |       |
| bio9     | Mean temperature of driest quarter (°C)           |      |      | *    |      |      |      |       |
| bio25    | Radiation of driest quarter (W m <sup>-2</sup> )  |      |      | 0.84 |      |      |      |       |
| bio12    | Annual precipitation (mm)                         |      |      |      | *    |      |      |       |
| bio16    | Precipitation of wettest quarter (mm)             |      |      |      | 0.97 |      |      |       |
| bio19    | Precipitation of coldest quarter (mm)             |      |      |      | 0.94 |      |      |       |
| bio28    | Annual mean moisture index                        |      |      |      | 0.91 |      |      |       |
| bio32    | Mean moisture index of wettest quarter            |      |      |      | 0.89 |      |      |       |
| bio35    | Mean moisture index of coldest quarter            |      |      |      | 0.88 |      |      |       |
| bio15    | Precipitation seasonality (C of V)                |      |      |      |      | *    |      |       |
| bio3     | Isothermality (bio2 ÷ bio7)                       |      |      |      |      | 0.67 |      |       |
| bio31    | Moisture index seasonality (C of V)               |      |      |      |      | 0.88 |      |       |
| bio17    | Precipitation of driest quarter (mm)              |      |      |      |      |      | *    |       |
| bio18    | Precipitation of warmest quarter (mm)             |      |      |      |      |      | 0.96 |       |
| bio33    | Mean moisture index of driest quarter             |      |      |      |      |      | 0.96 |       |
| bio34    | Mean moisture index of warmest quarter            |      |      |      |      |      | 0.96 |       |
| bio23    | Radiation seasonality (C of V)                    |      |      |      |      |      |      | *     |
| bio20    | Annual mean radiation (W m <sup>-2</sup> )        |      |      |      |      |      |      | -0.82 |
| bio26    | Radiation of warmest quarter (W m <sup>-2</sup> ) |      |      |      |      |      |      | -0.83 |
| bio27    | Radiation of coldest quarter (W m <sup>-2</sup> ) |      |      |      |      |      |      | -0.92 |

<sup>a</sup>Correlation coefficients (r<sup>2</sup>) are shown for each variable with its closest representative among the seven focal variables (bio1,4,9,12,15,17,23). Correlations are across values extracted for YST occurrences in North America and Europe (N = 525). Correlations over 0.6 were grouped by hierarchical clustering.

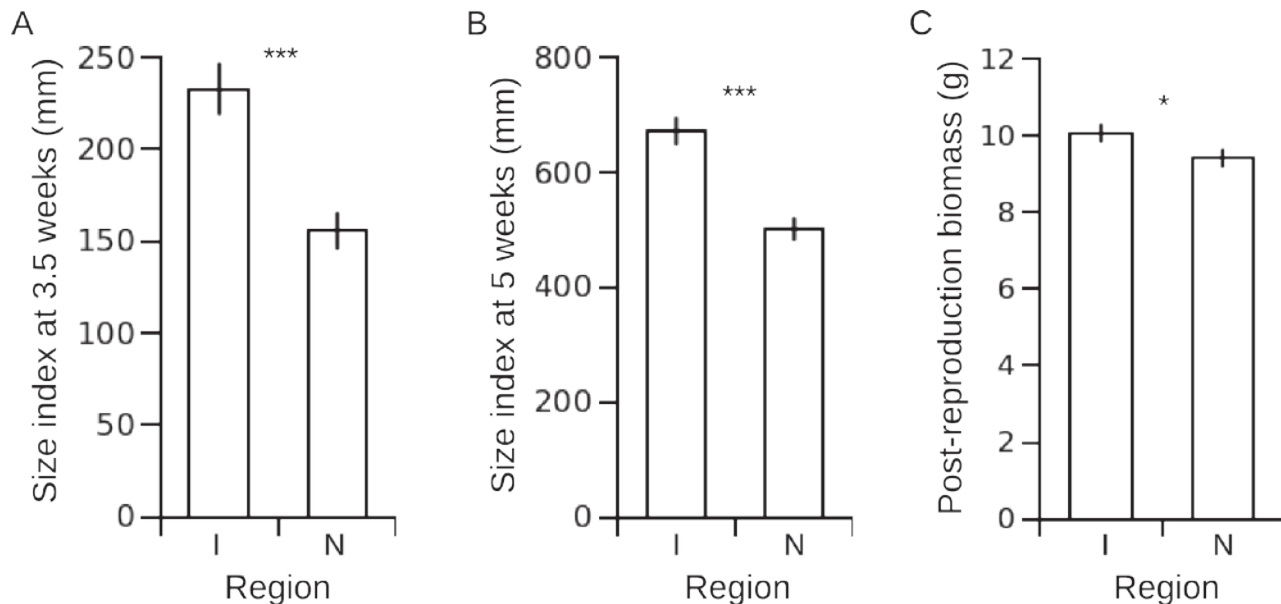

**Supplementary Figure 1.** Size differences between invading (I) and native (N) populations at three time points. The size index (see Methods) measured at 3.5 weeks (A) and 5 weeks (B) was  $\ln$  transformed for analysis; figures show LSMs  $\pm$  SEM from the model fit, back-transformed to a linear scale. Biomass collections (C) were made after flowering, when the basal rosette of leaves has senesced during the production of a reproductive stem and flowering heads (capitula); all biomass remaining on the plant was collected, including capitula, stems, and any remaining senescent leaves. (\* $P < 0.05$ ; \*\*\* $P < 0.0001$ )

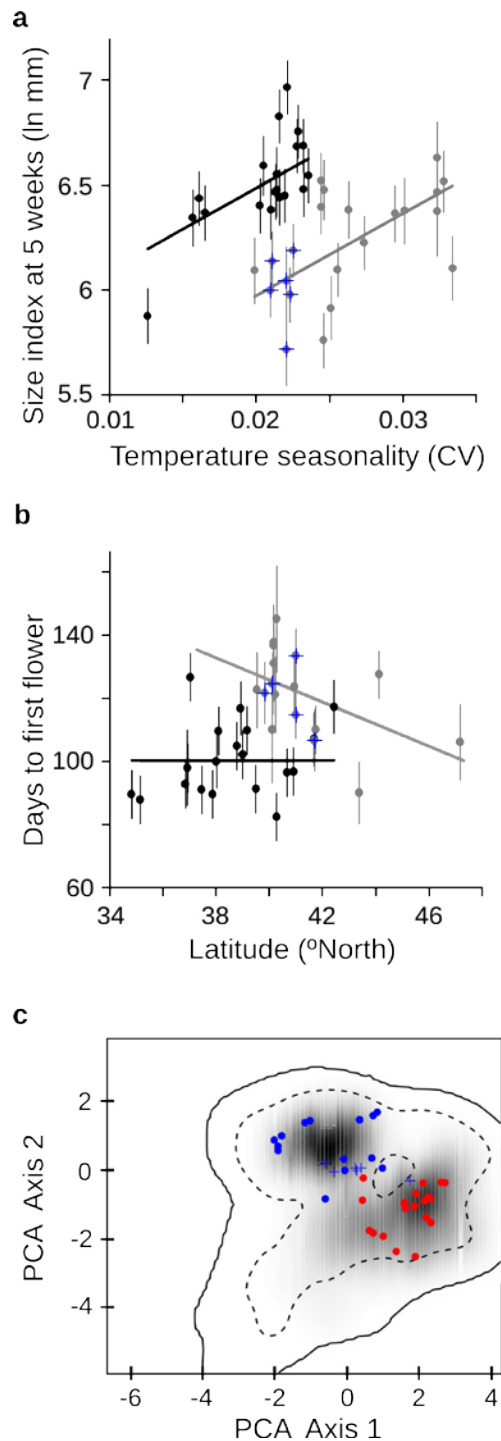

**Supplementary Figure 2.** Growth, flowering, and niche properties of six Spanish populations studied here (blue crosses) shown for comparison with the invading and other native populations. Spain appears to be the major source of invading Californian genotypes, though there is also evidence for admixture with eastern European sources (Gerlach 1997; Erikson et al. 2014), making no one source region a fully representative comparison for evolutionary change. (A) Size at 5 weeks is as in Fig 2B; (B) Days to flower is as in Fig 2D, for plants from five populations that flowered; and (C) position in Californian niche space is as in Fig 1Em where all native populations (blue) have been superimposed with invading populations (red). Spanish genotypes are among the smallest in size and most divergent in flowering time, though they occupy some of the most similar niche space to the Californian invasion.
